# Supplementary material for: Acrylic-based culture plate format perfusion device to establish liver endothelial–epithelial interface
Source: Royal Society of Chemistry journal article supplement (doi:10.1039/d3lc00382e), 2023-01-01
Supplement: d3lc00382e1.pdf [file d3lc00382e1.pdf]

1                    **Acrylic-based Culture Plate Format Perfusion Device**  
2                    **to Establish Liver Endothelial-Epithelial Interface**

3  
4            Dennis McDuffie<sup>1</sup>, Bhumi Suthar<sup>1</sup>, Charles G. Alver<sup>1</sup>, Madeline Helm<sup>1</sup>, David Oliver<sup>1</sup>,  
5            R. Alan Burgess<sup>2</sup>, David Barr<sup>2</sup>, Emmanuel Thomas<sup>2,3\*</sup> and Ashutosh Agarwal<sup>1,3,4\*</sup>

6  
7    <sup>1</sup>Department of Biomedical Engineering, University of Miami, Coral Gables, FL, USA

8    <sup>2</sup>Department of Pathology & Laboratory Medicine, Schiff Center for Liver Diseases, University  
9    of Miami Miller School of Medicine, Miami, FL, USA

10   <sup>3</sup>Sylvester Comprehensive Cancer Center, University of Miami Miller School of Medicine

11   <sup>4</sup>Desai Sethi Urology Institute, University of Miami Miller School of Medicine

12

13

14

15   **Corresponding Authors:**

16   Emmanuel Thomas, M.D., Ph.D., FAASLD

17   TEL: +1 305 243-2895

18   E-mail: [Ethomas1@med.miami.edu](mailto:Ethomas1@med.miami.edu) and

19   Ashutosh Agarwal, Ph.D.

20   TEL: +1 305 243-8925

21   E-mail: [A.agarwal2@miami.edu](mailto:A.agarwal2@miami.edu)

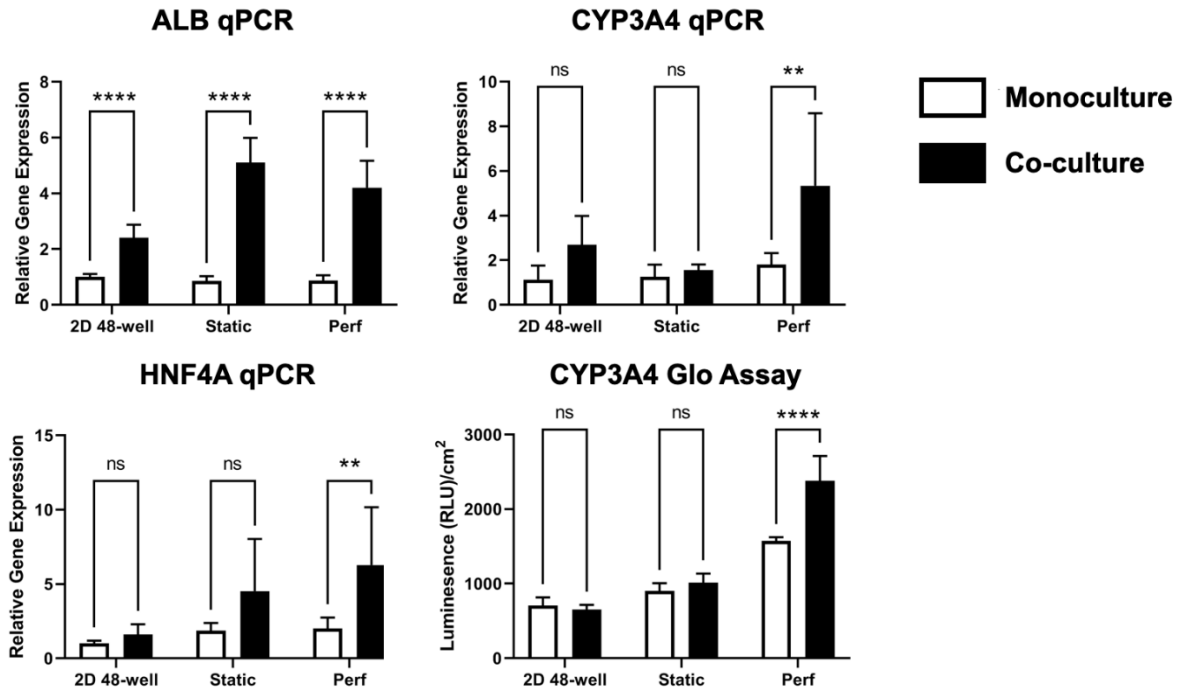

22

23 **Supplementary Figure 1: Monoculture vs. Co-Culture.** Each culture platform (2D, static MPS,  
 24 and perfusion MPS) was compared while seeded with monocultures and co-cultures for 7 days and  
 25 assessed on hepatocyte differentiation marker expression. The co-culture conditions were seeded  
 26 with HUVECs 1 day prior to HepaRG seeding. The monoculture MPS conditions did not have any  
 27 cells on the underside of the membrane, only HepaRGs on the top side of the membrane. The  
 28 perfusion MPS co-culture condition demonstrated significantly higher expression of all  
 29 differentiation markers of interest. HUVEC-HepaRG co-cultures were used in the static and  
 30 perfusion MPS conditions for all other experiments. Statistical significance was determined using  
 31 two-way ANOVA and Bonferroni's post-test (n = 4) \* p < 0.05, \*\* p < 0.01, \*\*\* p < 0.001, \*\*\*\*  
 32 p < 0.0001.

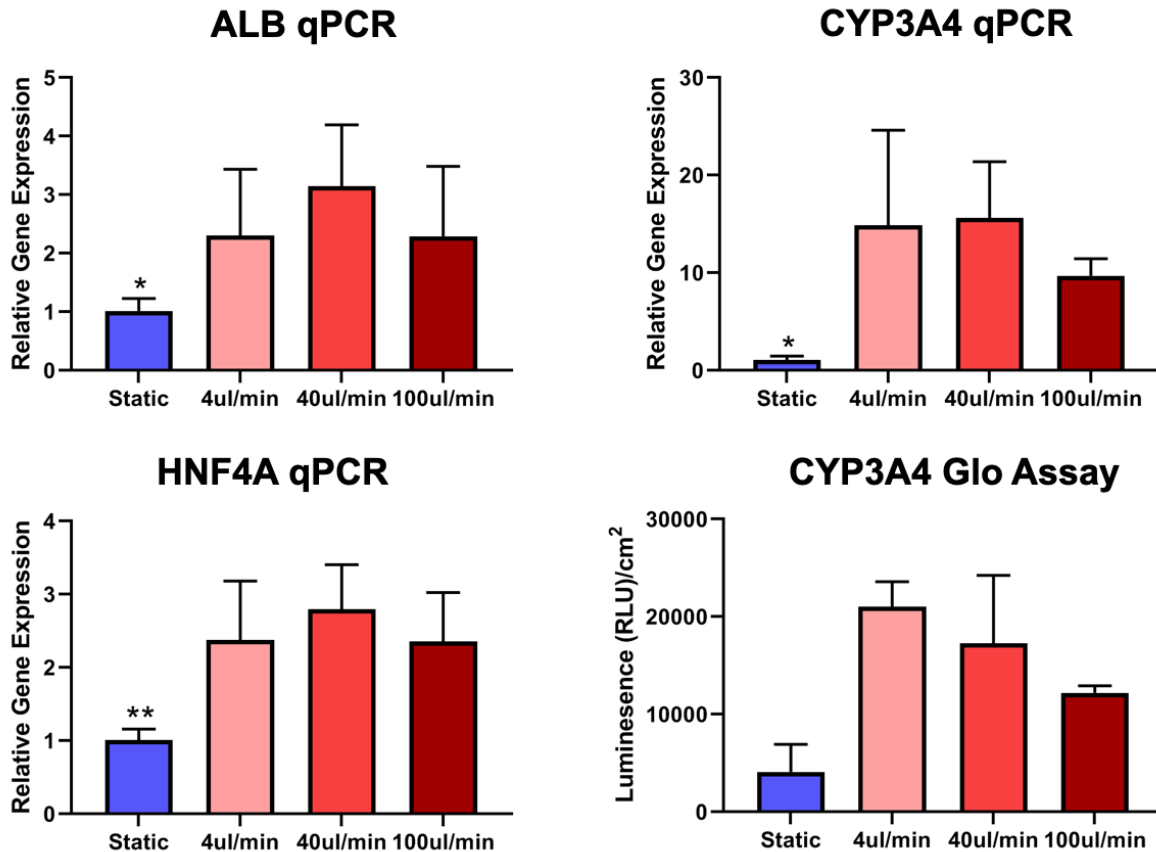

33

34 **Supplementary Figure 2: Flow Rate Comparison.** 3 different perfusion flow rates (4μL/min,  
 35 40μL/min, 100 μL/min) for the MPS co-culture condition were compared for 7 days and assessed  
 36 on hepatocyte differentiation marker expression. The presence of perfusion had a greater impact  
 37 on marker expression than changing the flow rate did, but across all markers, the 40μL/min flow  
 38 rate showed the highest degree of differentiation. 40μL/min was selected as the perfusion rate for  
 39 all other experiments. Statistical significance was determined using one-way ANOVA and  
 40 Tukey's *post hoc* test. Significance is given with respect to the 40μL/min condition (n = 4) \* p <  
 41 0.05, \*\* p < 0.01, \*\*\* p < 0.001, \*\*\*\* p < 0.0001.

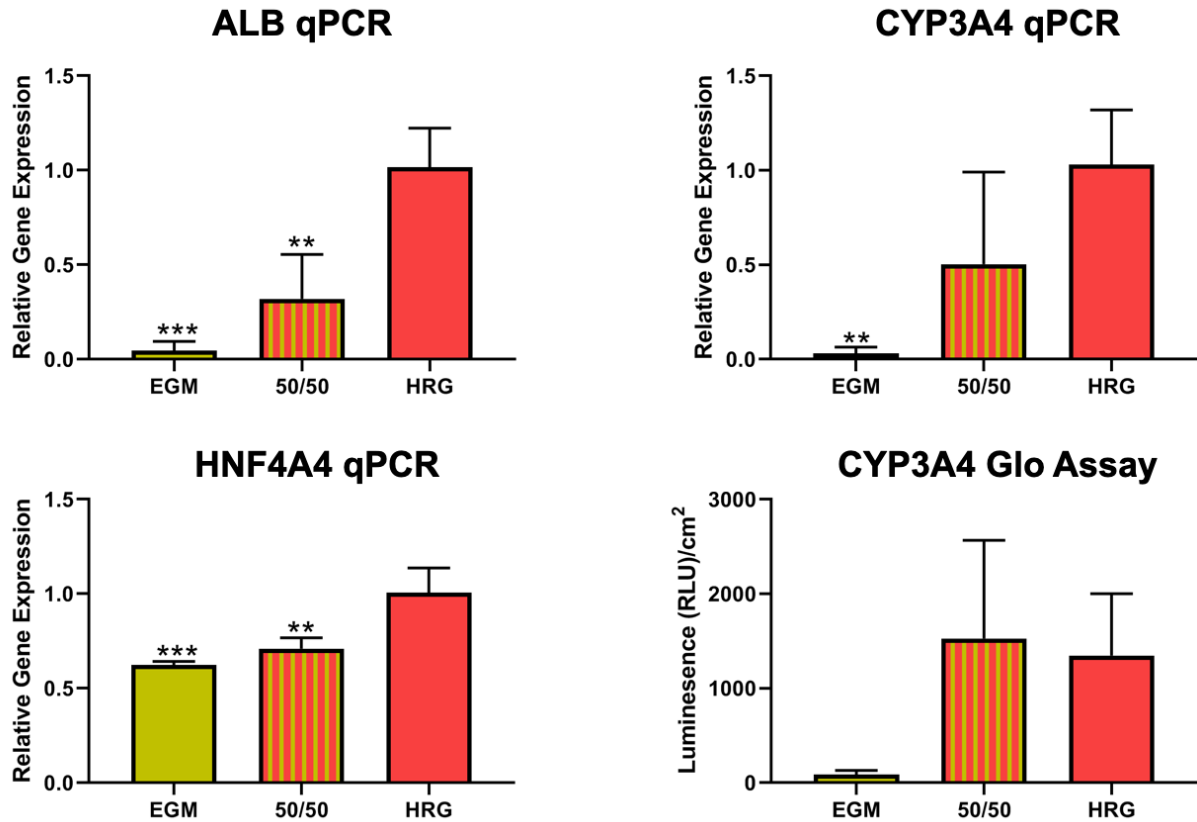

42  
 43 **Supplementary Figure 3: Media Comparison.** 3 different media combinations (all endothelial  
 44 media, 50/50 combination, all HRG media) for the perfusion MPS co-culture condition were  
 45 compared for 7 days and assessed on hepatocyte differentiation marker expression. The all HRG  
 46 media elicited significantly higher expression of albumin and HNF4A compared to both other  
 47 media combinations, and was not significantly different than the 50/50 media in terms of  
 48 CYP3A4 expression and activity. Only HRG media was used in all other experiments after  
 49 HepaRG seeding was complete. 2D co-cultures also only used HRG media. Statistical  
 50 significance was determined using one-way ANOVA and Tukey's *post hoc* test. Significance is  
 51 given with respect to the all HRG condition (n = 4) \* p < 0.05, \*\* p < 0.01, \*\*\* p < 0.001, \*\*\*\*  
 52 p < 0.0001.

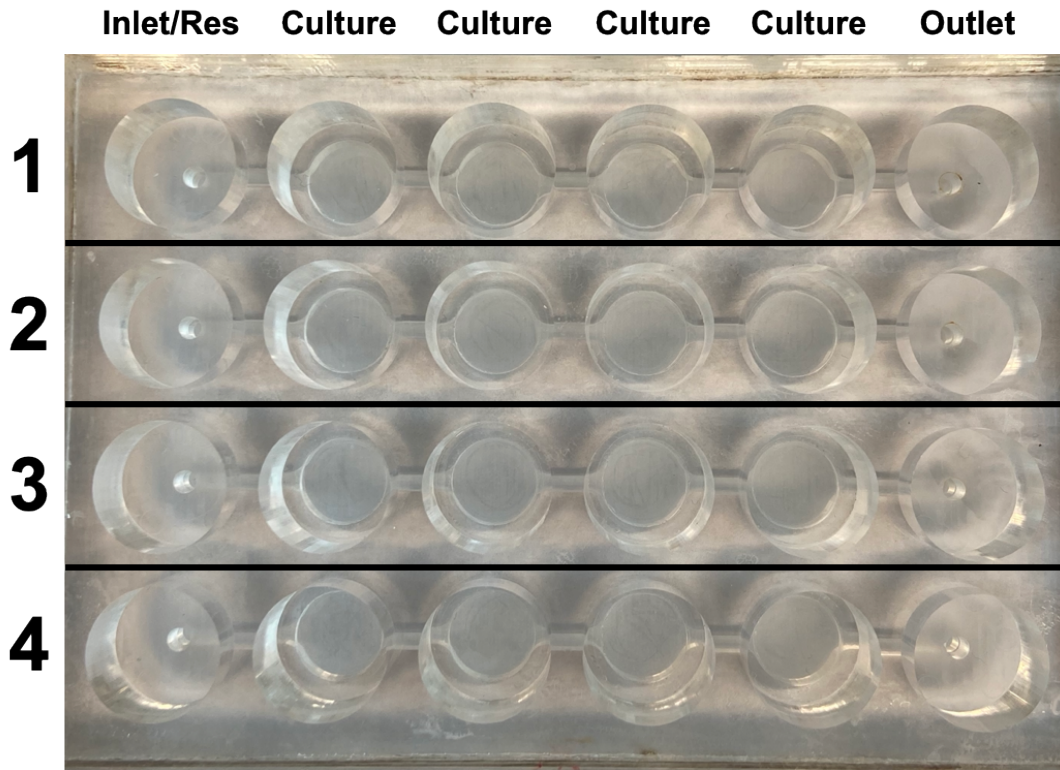

53

54 **Supplementary Figure: 4 Multi-Organ MPS.** This concept design links 4 separate culture  
55 wells on which 4 different tissues could theoretically be cultured in quadruplicate. This assembly  
56 could be used to test downstream effects of treatments on multiple different organs. The inlet  
57 well could serve as both an inlet (if media is not recirculating), or as a reservoir (if media is  
58 recirculating). The generic MPS can be altered and made more complex to accommodate  
59 different applications.

60

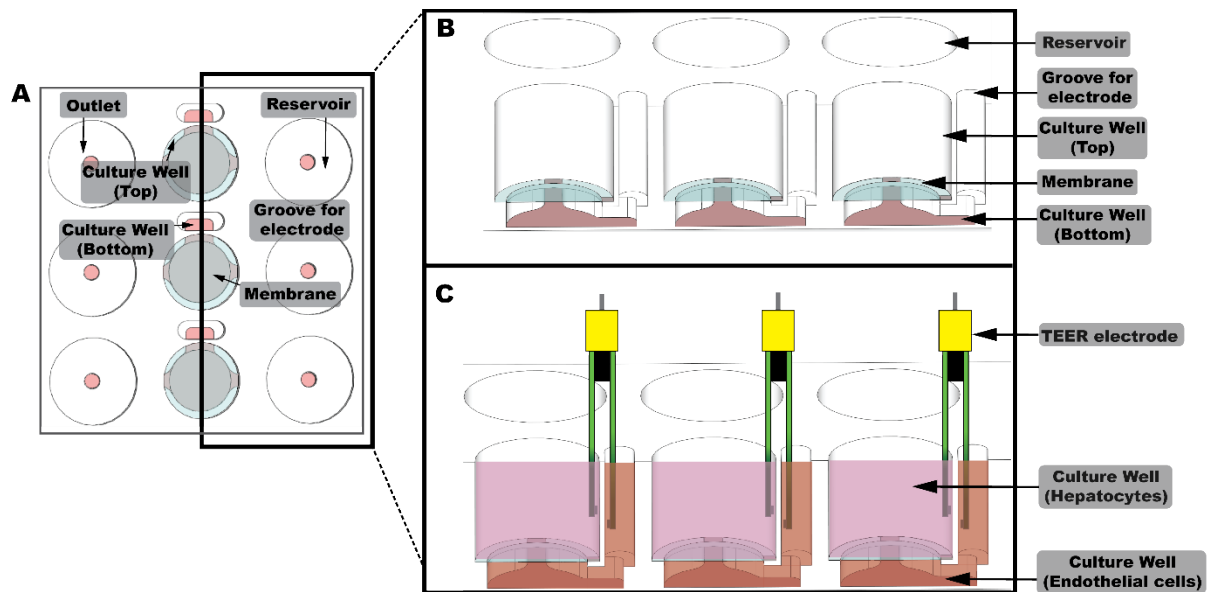

61  
 62 **Supplementary Figure: 5 Chip modifications for TEER measurements in situ.** The original  
 63 design was tweaked to enable in situ TEER measurements using chopstick electrode. The design  
 64 parameters such as the dimensions of the culture, reservoir, & outlet well remain the same. (A)  
 65 The prototype shown here features 3 outlet wells (left), 3 culture wells (middle), 3 grooves for  
 66 electrode, & 3 reservoir wells (right). (B) The inset shows a cross sectional view of the modified  
 67 chip. The top piece incorporates a groove to allow introduction of the TEER electrode. The culture  
 68 well of the bottom piece is slightly extended towards the groove allowing the electrode to access  
 69 the culture media. (C) The schematic shows the placement of TEER electrodes in top and bottom  
 70 culture well.



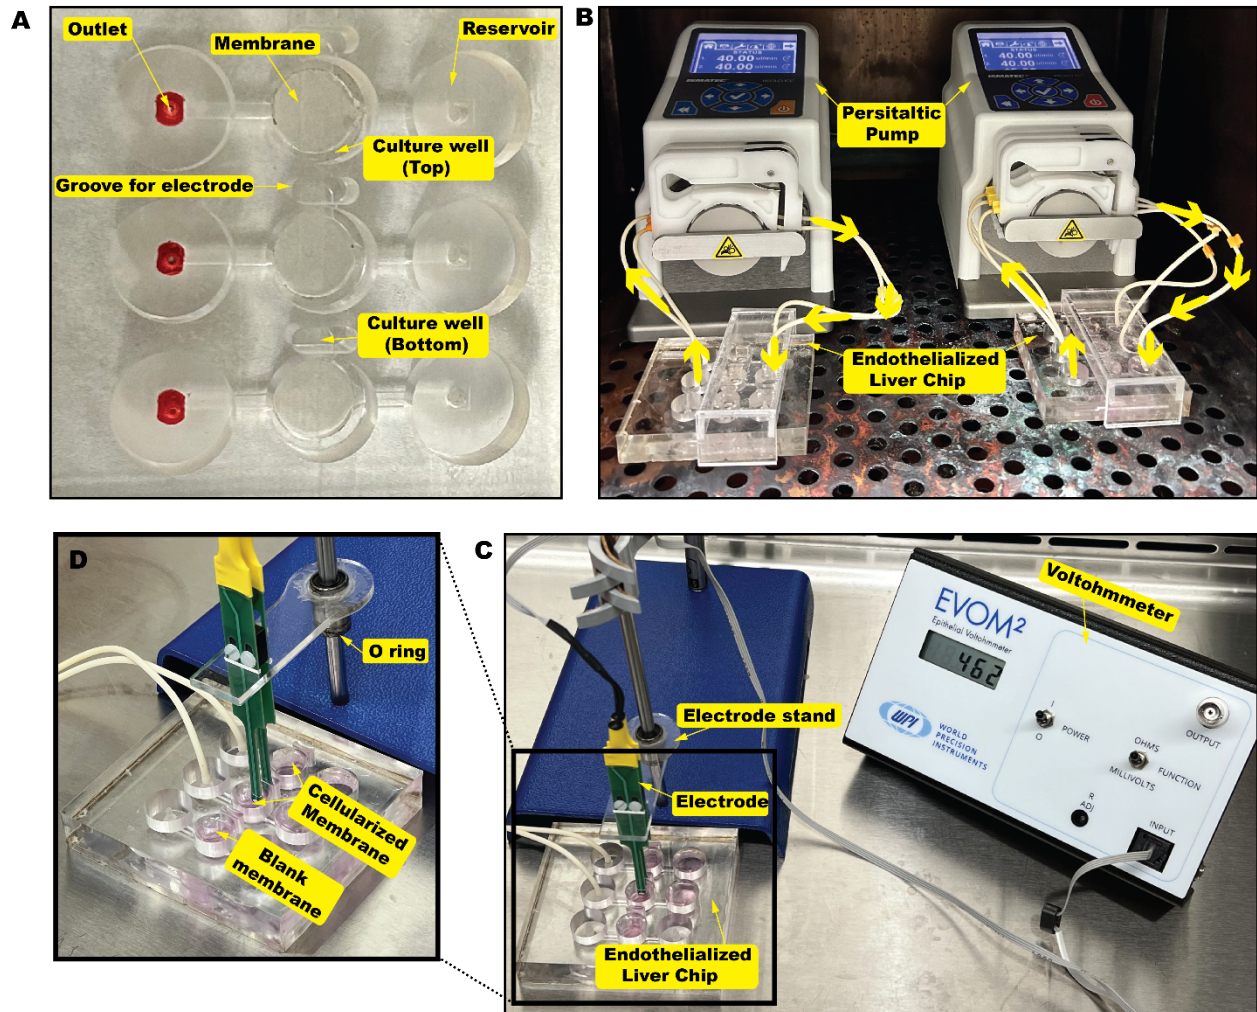

71  
 72 **Supplementary Figure 6: Chip and TEER measurement setup.** (A) Acrylic based chip was  
 73 milled featuring- outlet, reservoir wells, culture wells and a groove for electrode as shown. (B)  
 74 The chip setup consists of a peristaltic pump connected to the chip via peristaltic tubing. An acrylic  
 75 well casing to protect culture and reservoir wells whilst securing the tubing placement. The arrows  
 76 show the direction of the media flow. (C) TEER setup comprises of STX3 chopstick electrodes  
 77 connected to an EVOM<sup>2</sup> volt/ohm meter (World Precision Instruments). An electrode stand was  
 78 fabricated with acrylic to ensure that electrodes are perpendicular to the membrane thus avoiding  
 79 angle variance. (D) The depth of the electrodes immersed in culture media can be kept constant  
 80 for each reading by employing an O ring below the stand to avoid depth variance. Resistance of  
 81 the cell layer ( $R_{cells}$ ) is obtained by deducting the measured resistance ( $R_{meas}$ ) (membrane with  
 82 cells) from the resistance of the blank ( $R_{blank}$ ) (membrane without cells) i.e.  $R_{cells} = R_{meas} - R_{blank}$ .  
 83 To calculate the TEER value, we multiply the  $R_{cells}$  value with the area of membrane ( $1.727 \text{ cm}^2$ )  
 84 i.e.  $TEER = R_{cells} \times M_{area}$ .
